# Supplementary material for: Leucine-rich diet induces a shift in tumour metabolism from glycolytic towards oxidative phosphorylation, reducing glucose consumption and metastasis in Walker-256 tumour-bearing rats
Source: PubMed Central journal article supplement (PMC6820796; doi:10.1038/s41598-019-52112-w), 2019-10-29

## **Supplementary Figure 1 and 2**

**Manuscript title:** Leucine-rich diet induces a shift in Walker-256 tumour metabolism from glycolytic towards oxidative phosphorylation, reducing glucose consumption and metastasis in Walker-256 tumour-bearing rats.

**Authors:** Laís Rosa Viana, Natália Tobar, Estela Natacha Brandt Busanello, Ana Carolina Marques, Andre Gustavo de Oliveira, Tanes I. Lima, Gabrielly Machado, Bianca Gazieri Castelucci, Celso Dario Ramos, Sérgio Q Brunetto, Leonardo Reis Silveira, Anibal Eugenio Vercesi, Sílvio Roberto Consonni and Maria Cristina Cintra Gomes-Marcondes

Supplementary Figure 1. **In vitro study:** Walker 256 isolated cells treated or not with Leucine (50μM for 24 h). Related to Figure 2 in the main text

**Crooped:**

**Original:**

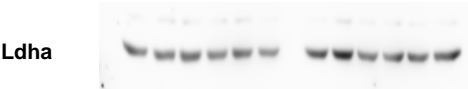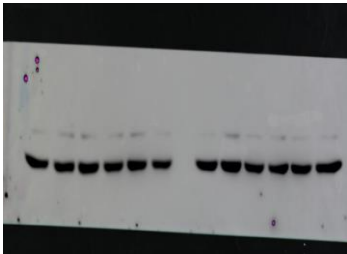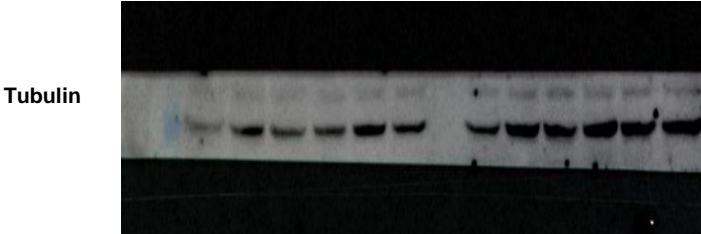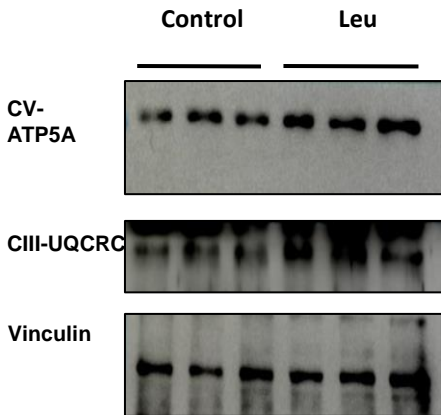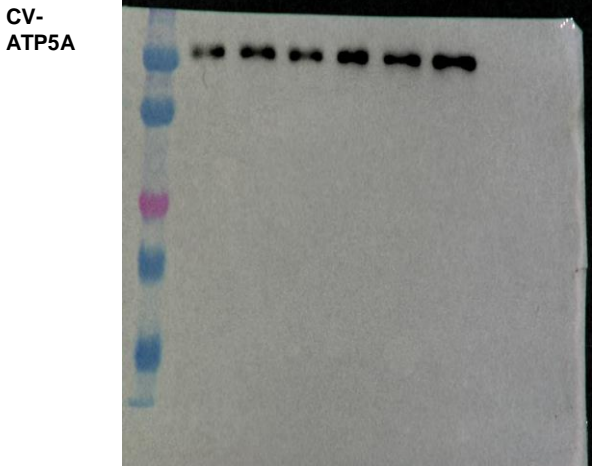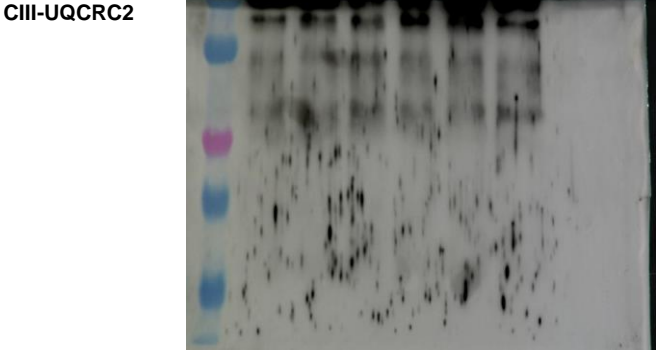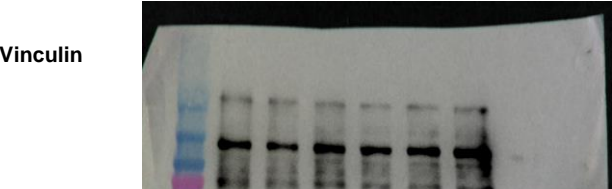

Supplementary Figure 2. *In vivo* study: Protein expression in tumour biopsies from Walker-256 tumour-bearing rats . Related to Figure 3 in the main text

Crooped:

Original:

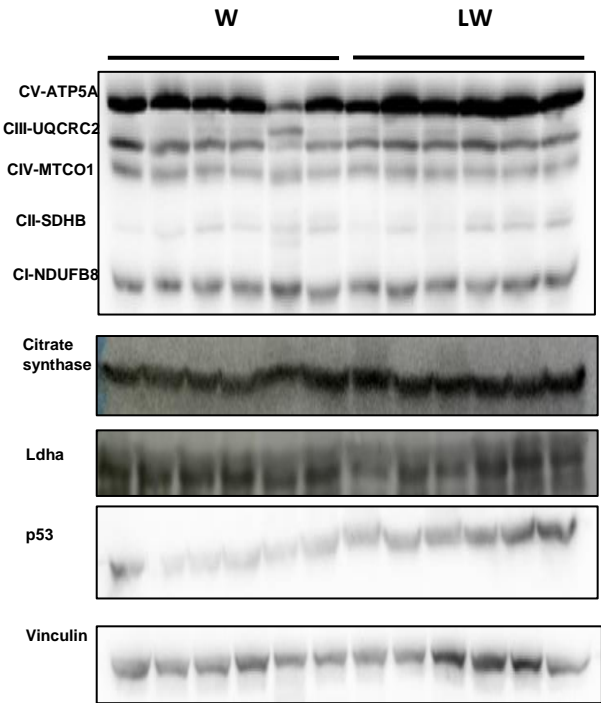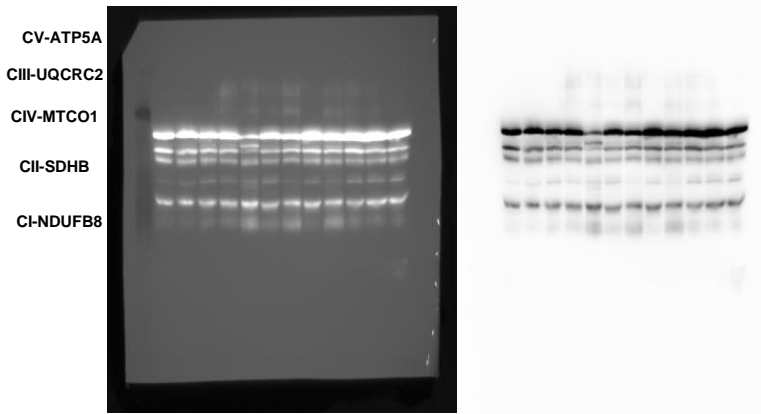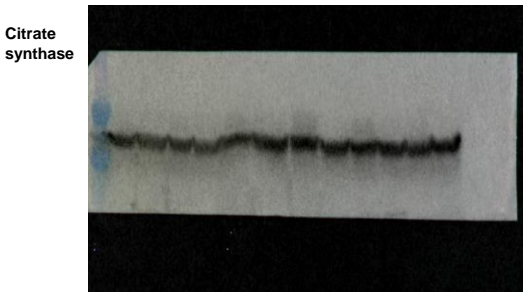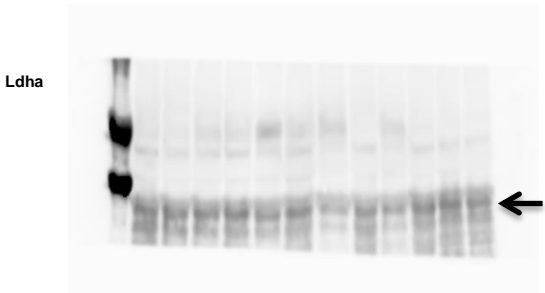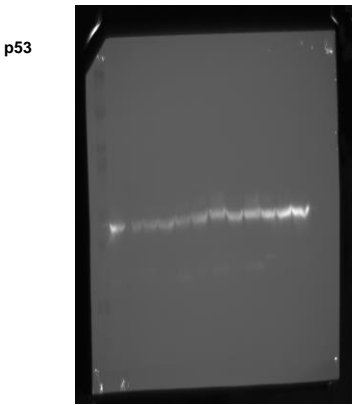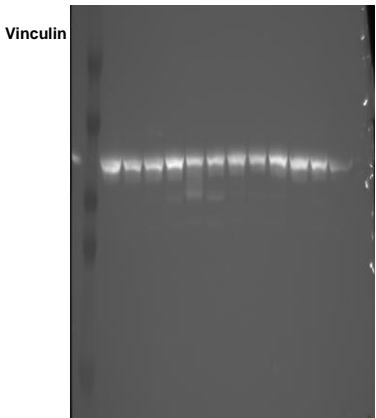

Supplement: 41598_2019_52112_MOESM1_ESM.pdf [file 41598_2019_52112_MOESM1_ESM.pdf]
